# Supplementary material for: A Peek into the Plasmidome of Global Sewage
Source: PubMed Central journal article supplement (PMC8269221; doi:10.1128/msystems.00283-21), 2021-05-26
Supplement: msystems.00283-21-st001.pdf [file msystems.00283-21-st001.pdf]

| sample                | continent     | Country                  | city           | extraction_date | plasmid_safe_dnase_date | phi20_date | sequencing_date | run_id            |
|-----------------------|---------------|--------------------------|----------------|-----------------|-------------------------|------------|-----------------|-------------------|
| Africa - CIV          | Africa        | Côte d'Ivoire            | Abidjan        | 25/03/2019      | 03/04/2019              | 04/04/2019 | 10/04/2019      | GS_Plasmidome_13  |
| Africa - GHA          | Africa        | Ghana                    | Tamale         | 25/03/2019      | 03/04/2019              | 04/04/2019 | 05/04/2019      | GS_Plasmidome_4   |
| Africa - NGA          | Africa        | Nigeria                  | NA             | 28/03/2019      | 15/04/2019              | 16/04/2019 | 06/05/2019      | GS_Plasmidome_50  |
| Africa - TZA          | Africa        | Tanzania                 | Moshi          | 01/04/2019      | 15/04/2019              | 16/04/2019 | 16/05/2019      | GS_Plasmidome_15  |
| Asia - CHN            | Asia          | China                    | Guangzhou      | 01/04/2019      | 15/04/2019              | 16/04/2019 | 13/05/2019      | GS_Plasmidome_64  |
| Asia - IND            | Asia          | India                    | Cochin         | 25/03/2019      | 03/04/2019              | 04/04/2019 | 05/04/2019      | GS_Plasmidome_11  |
| Asia - KHM            | Asia          | Cambodia                 | Phnom Penh     | 26/03/2019      | 03/04/2019              | 04/04/2019 | 12/04/2019      | GS_Plasmidome_21  |
| Asia - NPL            | Asia          | Nepal                    | Kathmandu      | 27/03/2019      | 15/04/2019              | 16/04/2019 | 16/05/2019      | GS_Plasmidome_33  |
| Asia - PAK            | Asia          | Pakistan                 | Karachi        | 25/03/2019      | 03/04/2019              | 04/04/2019 | 08/04/2019      | GS_Plasmidome_7   |
| Europe - ALB          | Europe        | Albania                  | Tirana         | 26/03/2019      | 03/04/2019              | 04/04/2019 | 10/04/2019      | GS_Plasmidome_17  |
| Europe - CZE          | Europe        | Czechia                  | Brno           | 27/03/2019      | 03/04/2019              | 04/04/2019 | 29/04/2019      | GS_Plasmidome_23  |
| Europe - DEU          | Europe        | Germany                  | Berlin         | 27/03/2019      | 03/04/2019              | 04/04/2019 | 29/04/2019      | GS_Plasmidome_27  |
| Europe - ESP          | Europe        | Spain                    | Barcelona      | 01/04/2019      | 15/04/2019              | 16/04/2019 | 20/05/2019      | GS_Plasmidome_75  |
| Europe - ISL          | Europe        | Iceland                  | Reykjavik      | 27/03/2019      | 03/04/2019              | 04/04/2019 | 01/05/2019      | GS_Plasmidome_28  |
| Europe - POL          | Europe        | Poland                   | Pu_awy         | 28/03/2019      | 15/04/2019              | 16/04/2019 | 03/05/2019      | GS_Plasmidome_36  |
| Europe - SVN          | Europe        | Slovenia                 | Ljubljana      | 28/03/2019      | 15/04/2019              | 16/04/2019 | 03/05/2019      | GS_Plasmidome_38  |
| Europe - XK           | Europe        | Kosovo                   | Prishtina      | 01/04/2019      | 15/04/2019              | 16/04/2019 | 08/05/2019      | GS_Plasmidome_60  |
| North America - CAN   | North America | Canada                   | Toronto        | 26/03/2019      | 03/04/2019              | 04/04/2019 | 12/04/2019      | GS_Plasmidome_22b |
| North America - USA.1 | North America | United States of America | Portland,OR    | 01/04/2019      | 15/04/2019              | 16/04/2019 | 13/05/2019      | GS_Plasmidome_74d |
| North America - USA.2 | North America | United States of America | El Paso, Texas | 01/04/2019      | 15/04/2019              | 16/04/2019 | 20/05/2019      | GS_Plasmidome_74e |
| South America - BRA.1 | South America | Brasil                   | Belo Horizonte | 28/03/2019      | 15/04/2019              | 16/04/2019 | 08/05/2019      | GS_Plasmidome_53  |
| South America - BRA.2 | South America | Brasil                   | Belém          | 28/03/2019      | 15/04/2019              | 16/04/2019 | 06/05/2019      | GS_Plasmidome_53a |
| South America - ECU   | South America | Ecuador                  | Galapagos      | 25/03/2019      | 03/04/2019              | 04/04/2019 | 08/04/2019      | GS_Plasmidome_14a |
| South America - PER   | South America | Peru                     | Lima           | 27/03/2019      | 15/04/2019              | 16/04/2019 | 01/05/2019      | GS_Plasmidome_35  |
